# Supplementary material for: Evaluating the effects of land-use change and future climate change on vulnerability of coastal landscapes to saltwater intrusion
Source: Oxford University Press journal article supplement (doi:10.1525/elementa.316), 2018-01-01
Supplement: elementa-6-316-s1.docx [file elementa-6-316-s1.docx]

Elementa: Science of the Anthropocene

Supporting Information for

**Evaluating the effects of land-use change and future climate change on vulnerability of coastal landscapes to saltwater intrusion**

Abinash Bhattachan1,2,*, Ryan E Emanuel1,2, Marcelo Ardón1, Emily S Bernhardt3,Steven M Anderson1,3, Matthew G Stillwagon1, Emily A Ury3, Todd K BenDor4, Justin P Wright3

1 Department of Forestry and Environmental Resources, North Carolina State University, Raleigh NC 27695

2 Center for Geospatial Analytics, North Carolina State University, Raleigh NC 27695

3 Department of Biology, Duke University, Durham NC 27708

4 Department of City and Regional Planning, University of North Carolina – Chapel Hill, Chapel Hill NC 27599

* corresponding author: [abhatta9@ncsu.edu](mailto:abhatta9@ncsu.edu)

Contents of this file:

**Figure S1:** Workflow to identify and remove artificial drainages (post- to pre-development) and extract z-1 and Fa to calculate SIVI.

**Figure S2**: Relationship between water extractable calcium and magnesium (a, d), chloride (b, e), sulfate (c, f), calcium concentrations (μeq g-1) from soil solution (0-5 cm depth) and SIVI (a, b, c) and elevation (d, e, f).

**Table S1:** Linear regression models relating SIVI and elevation versus water extractable ionic concentrations in soil solution.

**Figure S1:** Workflow to identify and remove artificial drainages (post- to pre-development) and extract z-1 and Fa to calculate SIVI.

**Figure S2**: Relationship between water extractable calcium and magnesium (a, d), chloride (b, e), sulfate (c, f), calcium concentrations (μeq g-1) from soil solution (0-5 cm depth) and SIVI (a, b, c) and elevation (d, e, f).

**Table S1:** Linear regression models relating SIVI and elevation versus water extractable ionic concentrations in soil solution.

|  | *r2* | *p* | *Slope* |
| --- | --- | --- | --- |
| SIVI |  |  |  |
| Cl- | 0.07 | < 0.01 | 28.58 |
| SO42- | 0.06 | < 0.01 | 120.48 |
| Ca2+ and Mg2+ | 0.02 | 0.11 | 2.54 |
| Elevation |  |  |  |
| Cl- | 0.03 | < 0.01 | -14.50 |
| SO42- | 0.03 | < 0.01 | -66.56 |
| Ca2+ and Mg2+ | 0.02 | 0.11 | -2.21 |
